# Supplementary material for: Contrasting roles for IKK-regulated inflammatory signalling pathways for development and maintenance of type 1 and adaptive γδ T cells
Source: eLife. 2026 Apr 10;14:RP108940. doi: 10.7554/eLife.108940 (PMC13068431; doi:10.7554/eLife.108940)
Supplement: Figure 1—source data 1. [file elife-108940-fig1-data1.xlsx]

## Sheet: Figure 1
PANEL B							PANEL D
Progenitor		ADAPTIVE		Type 1			ADAPTIVE						Type I						Type 17
Cre -ve	IKKΔTCD2	Cre -ve	IKKΔTCD2	Cre -ve	IKKΔTCD2		L-	L+	S-	S+	T-	T+	L-	L+	S-	S+	T-	T+	L-	L+	S-	S+	T-	T+
5170	2730	132000	53300	11100	17400		814120	12820	355870	8680	1170000	21500	139050	12800	115940	5900	255000	18700	169050	175760	90940	84230	260000	260000
7310	8550	130000	170000	8320	8550		546820	8480	453170	21010	1000000	29500	114860	7820	115130	8370	230000	16200	358670	92370	133320	27620	492000	120000
25600	6560	205000	102000	15700	3470		1300000	16460	330000	14530	1630000	31000	25010	6210	80980	10780	106000	17000	166510	129230	37490	10760	204000	140000
11900	8310	97100	136000	10700	1760		591270	8760	778720	10230	1370000	19000	65590	6730	136400	2360	202000	9100	51650	74870	111340	11630	163000	86500
20600	3350	223000	86800	56400	2100		311140	13000	454850	13000	766000	26000	87580	14070	274410	4920	362000	19000	110820	47550	103170	14040	214000	61600
7120	2620	139000	80900	48800	3190		224530	13040	363460	19160	588000	32200	61010	1050	187980	2300	249000	3350	181230	38980	61760	8910	243000	47900
24500	4230	291000	77700	82400	970		418520	18260	326470	42330	745000	60600	54820	600	189170	830	244000	1440	84690	233910	43300	5080	128000	239000
	4880		106000		1520			10720		22280		33000		220		900		1130		136590		15400		152000
	25000		117000		5760			10780		15210		26000		2670		6230		8900		94670		33320		128000
	22000		122000		4450			8310		23690		32000		1660		11230		12900		66970		12920		79900
	6610		41200		3150			9900		62690		72600		200		1400		1600		15590		28400		44000
	26100		178000		21200			15570		16320		31900		2150		2350		4500		33980		19710		53700
	2610		82800		13600			18670		2520		21200		2470		19920		22400		76270		90720		167000
	24200		301000		43900			24780		1010		25800		3310		17680		21000		45590		51540		97130
