# Supplementary material for: Contrasting roles for IKK-regulated inflammatory signalling pathways for development and maintenance of type 1 and adaptive γδ T cells
Source: eLife. 2026 Apr 10;14:RP108940. doi: 10.7554/eLife.108940 (PMC13068431; doi:10.7554/eLife.108940)
Supplement: Figure 2—source data 1. [file elife-108940-fig2-data1.xlsx]

## Sheet: Figure 2
PANEL A							PANEL C
Cre -ve	Casp8. IKKΔTCD2	Cre -ve	Casp8. IKKΔTCD2	Cre -ve	Casp8. IKKΔTCD2		L-	L+	S -	S +	T-	T+	L-	L+	S -	S +	T-	T+	L-	L+	S -	S +	T-	T+
24300	19100	274600	19700	16900	10600		693400	12000	1306500	30000	2000000	42000	200000	31000	360000	38000	560000	69000	650000	65600	220000	34300	870000	100000
42100	17800	316900	75000	30300	4800		754400	30000	945500	33000	1700000	63000	170000	45400	250000	30500	420000	76000	610000	70900	190000	39000	800000	110000
12800	22500	167200	112000	7600	10000		442700	13000	426500	17000	869200	30000	68900	11800	84800	9100	153700	21000	223300	89900	71600	50000	294900	140000
62100	18300	273000	96800	29000	15000		334100	27000	795800	26000	1130000	53000	2000	21000	27500	21000	29600	42000	197000	53000	111000	30000	308000	83000
16000	68300	258000	216900	34600	16200		550000	31700	1020000	68200	1570000	100000	84300	41000	372600	55000	457000	96000	169000	50000	226000	35000	395000	85000
46700	38000	204500	49700	14900	11500		392400	10300	419500	19600	812000	30000	125000	32300	249000	58600	374000	91000	159000	175200	106000	44700	265000	220000
35500	48400	140600	134600	9500	10700		855500	32500	542600	40400	1398100	73000	234600	15000	188300	26000	423000	41000	369500	114700	162000	15200	531500	130000
	40900		390400		22100			80000		100000		180000		44600		85300		130000		117600		32300		150000
	20700		168200		3900			21400		78300		99700		5100		24100		29200		14500		49200		63700
	7600		43000		1000			14300		26800		41200		2300		11600		14000		12600		62300		74900
	78900		214000		64300			22100		59900		82100		3500		17900		21400		136400		58500		195000
	5000		79100		8400			33700		23800		57600		5000		28200		33300		26500		34000		60500
	27600		8600		11400			4100		7200		11300		4000		26700		30800		117700		49200		167000
