# Supplementary material for: Contrasting roles for IKK-regulated inflammatory signalling pathways for development and maintenance of type 1 and adaptive γδ T cells
Source: eLife. 2026 Apr 10;14:RP108940. doi: 10.7554/eLife.108940 (PMC13068431; doi:10.7554/eLife.108940)
Supplement: Figure 3—source data 1. [file elife-108940-fig3-data1.xlsx]

## Sheet: Figure 3
PANEL B
ADAPTIVE				Type 1				Type 17
– WT	+ WT	– KD	+ KD	– WT	+ WT	– KD	+ KD	– WT	+ WT	– KD	+ KD
302000	2830	258000	38000	177000	2340	122000	17300	243000	46200	167000	8080
295000	3370	273000	25500	199000	3220	102000	11700	254000	34700	99900	9130
270000	3800	210000	41000	165000	2750	140000	15000	237000	44200	109000	7500
330000	2340	310000	22000	180000	2900	100000	14400	238000	36700	156000	9750
205000	2500			240000	5400			350000	39000
445000	2400			135000	1800			205000	65000
