# Supplementary material for: Contrasting roles for IKK-regulated inflammatory signalling pathways for development and maintenance of type 1 and adaptive γδ T cells
Source: eLife. 2026 Apr 10;14:RP108940. doi: 10.7554/eLife.108940 (PMC13068431; doi:10.7554/eLife.108940)
Supplement: Figure 4—source data 1. [file elife-108940-fig4-data1.xlsx]

## Sheet: Figure 4
PANEL B							PANEL D
Progenitor		Adaptive		Type 1			Adaptive						Type 1						Type 17
–	+	–	+	–	+		L-	L+	S-	S+	T-	T+	L-	L+	S-	S+	T-	T+	L-	L+	S-	S+	T-	T+
100000	66000	290000	270000	7000	8600		113100	12400	116800	16700	230000	29200	57700	1300	99200	5900	157000	7300	37000	17400	79900	26400	117000	43900
65000	56000	330000	180000	6000	9800		124100	12000	75800	14600	200000	26700	46300	700	43600	5000	90000	5800	31900	25300	35000	28400	67000	53800
52000	115000	445000	349000	7400	6500		206200	7100	123700	5800	330000	13000	44100	1600	65800	5800	110000	7500	22600	6700	14300	82200	37000	89000
27700	143000	121000	368000	3700	20800		28300	5500	56900	3600	85200	9200	7100	900	18000	2700	25200	3700	14400	11700	15200	25200	29600	37000
45600	31100	221000	204000	5200	4300		40900	4800	52800	3900	93700	8700	7800	1200	8800	2400	16700	3600	26900	16400	11100	3000	38000	19500
13400	17300	221000	101000	3700	1300		28300	1600	56900	3100	85200	4700	7100	500	18000	500	25200	1100	14900	10000	14300	7000	29300	17100
17900	33200	121000	204000	5200	4300		40900	4800	52800	3900	93700	8700	7800	300	8800	700	16700	1100	17300	6000	19300	9500	36700	15600
28800	75100	148000	101000	700	1300		100900	1600	85000	3100	186000	4700	25000	700	17600	600	42600	1300	26800	12000	12400	2900	39300	15000
14900	36800	152000	265000	3300	1800		35000	6400	21200	7200	56300	13700	5500	900	1600	4300	7100	5300	106500	29400	18400	27500	125000	57000
29300	15600	189000	288000	4400	13400		38800	3900	32700	5700	71500	9700	2100	400	1200	4000	3400	4400	25200	6200	7400	1900	32600	8100
	92600		303000		8700		81500	4700	91400	6700	173000	11500	13200	600	24600	4000	37900	4700	17800	5700	15900	5200	33700	11000
	21900		17600		1400		116000	2600	122000	4500	238000	7100	13800	1200	29100	1400	42900	2700	18300	45100	40300	32000	58600	77200
							47500	3900	11000	4500	58600	8500	10700	800	47800	400	58600	1300	26400	11100	59100	5400	85500	16600
							67400	8400	18000	12500	85500	21000	5900	300	79500	1200	85500	1500	17900	18000	3000	23700	21000	41700
