# Supplementary material for: Contrasting roles for IKK-regulated inflammatory signalling pathways for development and maintenance of type 1 and adaptive γδ T cells
Source: eLife. 2026 Apr 10;14:RP108940. doi: 10.7554/eLife.108940 (PMC13068431; doi:10.7554/eLife.108940)
Supplement: Figure 5—source data 1. [file elife-108940-fig5-data1.xlsx]

## Sheet: Figure 5
PANEL B													PANEL C
ADAPTIVE				Type I				Type 17					Type I		Type 17
Cre -ve	Casp8ΔT	RIPK1D138N cre -ve	Casp8ΔT RIPK1D138N	Cre -ve	Casp8ΔT	RIPK1D138N cre -ve	Casp8ΔT RIPK1D138N	Cre -ve	Casp8ΔT	RIPK1D138N cre -ve	Casp8ΔT RIPK1D138N		% IFNg		% IL-17
230000	29200	176000	254000	157000	7340	71200	37600	117000	43900	73200	79700		Cre–	Cre+	Cre–	Cre+
200000	26700	78200	192000	90000	5810	26700	45000	67000	53800	41800	11400		44.6	50	59.9	79.3
330000	13000	36700	227000	110000	7500	4440	36900	37000	89000	6050	23600		51	54	70.9	63.8
85200	9200	40600	115000	25200	3700	2560	22500	29600	37000	5550	176000		48.9	55	40.7	81
93700	8730	207000	69000	16700	3691	98500	2580	38000	19500	190000	233000		62	56	52.3	61.7
85200	4770	55500	55500	25200	1101	98500	29700	29300	17100	189000	196000
93700	8730	107000	179000	16700	1110	17700	44100	36700	15600	35100	169000
186000	4770	130300	137000	42600	1369	21000	21000	39300	15000	75500	226000
56300	13700		135000	7170	5330		29700	125000	57000		190000
71500	9740		84500	3420	4470		44100	32600	8150		43100
173000	11500		79100	37900	4750		21000	33700	11000		31200
238000	7130		110000	42900	2700		12000	58600	77200		111000
58600	8560		126000	58600	1320		8410	85500	16600		86700
85500	21000		57700	85500	1550		18900	21000	41700		44800
			64300				16300				61800
			58500				8180				28900
