# Supplementary material for: Contrasting roles for IKK-regulated inflammatory signalling pathways for development and maintenance of type 1 and adaptive γδ T cells
Source: eLife. 2026 Apr 10;14:RP108940. doi: 10.7554/eLife.108940 (PMC13068431; doi:10.7554/eLife.108940)
Supplement: Figure 6—source data 1. [file elife-108940-fig6-data1.xlsx]

## Sheet: Figure 6
PANEL B							PANEL D
Progenitor		Adaptive		Type I			Adaptive		Type I		Type 17
Cre -ve	IKK1ΔTCD2	Cre -ve	IKK1ΔTCD2	Cre -ve	IKK1ΔTCD2		Cre -ve	IKK1ΔTCD2	Cre -ve	IKK1ΔTCD2	Cre -ve	IKK1ΔTCD2
2470	2320	20800	29100	66300	86900		138000	163000	46000	86900	57800	41400
4610	4500	16700	23400	26000	81900		131000	55900	29000	15000	98600	21600
1370	1240	17100	30200	29200	281000		81900	119000	15300	13500	28200	18600
2190	1820	17500	13800	51000	76600		91800	86300	8030	53100	36400	55900
2640	2200	12700	33000	47500	22500		105000	124000	36100	82200	44600	39400
3630		27100		200000			312000		28800		146000
