# Supplementary material for: Contrasting roles for IKK-regulated inflammatory signalling pathways for development and maintenance of type 1 and adaptive γδ T cells
Source: eLife. 2026 Apr 10;14:RP108940. doi: 10.7554/eLife.108940 (PMC13068431; doi:10.7554/eLife.108940)
Supplement: Figure 7—source data 1. [file elife-108940-fig7-data1.xlsx]

## Sheet: Figure 7
PANEL A							Panel B			TOTAL						Lymph Node						Spleen
RelA:Nfkb1:cRel	+ + +	– + +	– – +	– + –	+ – +			+ + +	– + +	– – +	– + –	+ – +		+ + +	– + +	+ – +	– – +	– + –		+ + +	– + +	+ – +	– – +	– + –
Progenitor	46700	20400	14800	19600	52200		Adaptive	646700	571900	70000	90000	1759800		369000	333400	439700	25900	55500		277600	238400	1320100	44000	34500
	28000	58900	43500	30400	24400			1156200	2135000	44200	132900	492900		418800	1379900	60300	27400	57200		737400	755100	432600	16700	75600
	36600	18100	4700	16000	14000			1287100	590900	73600	198300	564500		479100	173200	204400	31800	123400		808000	417700	360100	28800	74800
	58800	19200	3100	10900	7200			785800	558100	13400	120600	703000		1161500	211000	327800	45800	66400		1226200	347100	375000	27700	54100
	33800	54000	1300	3500	11400			669000	690000	60700	168000	790000		171800	320000	325600	8300	3500		614000	378100	464000	5000	10700
	35400	3100		11600	11700			605300	235100		297000	731000		290000	93100	299000		31300		379200	141900	432000		17500
	27200	10000		3800	9100			410000	424000		14300	179000		149000	253000	66900		71900		456200	171000	112000		45900
	9700	6400		7600	13900			598500	342000		48900	413700		71000	206000	174200		113000		343200	137000	239500		55200
	14000	4400		6700	12900			916000	268700		117800	254100		275000	87500	45900		165000		323500	181100	208200		132000
	19100	8500		12000	28300			725000	281400		57600	238800		305700	86800	71000		15300		672000	195000	167700		42200
	13800			4000				977000			66400			448000				38600		443700				27800
	8000			8200				892100			127400			390000				27800		526000				99600
	15500							666200						340000						385100
	27400							361100						107900						558300
Adatpive	179000	137000	51100	171800	275000		Type 1	258400	51500	10000	17100	273000		99400	25300	92400	600	3800		158900	26100	363000	9300	13200
	176000	118400	177400	158400	124500			355900	62000	10400	26000	40100		108700	43200	5200	4500	6800		247200	103300	70000	5800	19200
	346300	118400	41800	158400	130300			443400	23000	7400	30800	95000		122300	5300	14300	1100	2000		321000	56600	80700	2500	12500
	327200	64600	25500	110000	117000			218700	29900	1800	14500	103000		230500	8500	22400	1700	700		459800	14500	80600	5600	15500
	251400	185000	11300	146500	147000			256500	100000	3700	16300	161000		14700	22000	34000	600	1100		204000	79500	127000	1100	800
	210000	35700		39200	194000			238700	13800		35200	218000		43400	2000	43100		3400		213100	11800	175000		3100
	185100	66300		109000	151000			130000	44500		50400	117000		16000	8200	24400		2300		222700	36300	92300		17000
	103000	41000		46000	106200			70400	33600		6600	70900		8600	6600	19200		5800		122900	27000	51700		29300
	78800	37800		67200	102500			296000	81100		19300	147500		15600	9900	8500		4800		54700	71200	139000		45600
	151000	64600		57800	149900			291000	83900		31900	128000		34100	7600	25500		3500		303000	76200	102400		28300
	151400			77100				337000			15600			41500				4900		181900				10700
	109000			38900				223500			50700			53200				5900		243000				44800
	47200							322200						71500						219700
	105600							209200						18800						303300
Type I	38700	25400	8300	13500	53900		Type 17	238500	35100	50100	77500	305500		115700	19800	25300	40000	49500		122700	15200	280100	10100	27900
	49800	8000	25600	12600	18400			207600	77200	25400	128600	187200		96600	36900	4800	22900	93300		111000	40200	182300	2500	35300
	50100	14500	2300	5500	6600			600900	101800	10400	51200	66000		346000	35500	27900	16200	43100		254900	66200	38100	2100	8000
	59400	6000	2900	4300	6100			164200	63900	22200	48400	122000		323600	16700	38400	6200	42800		295700	47100	83800	4100	5600
	43600	12700	1900	500	9300			134700	44000	18300	48400	186000		70900	8600	89000	13300	131700		93300	35700	96700	8900	56800
	34000	1100		1400	13800			297100	183600		181000	100000		55100	94200	15500		59200		79600	89400	84700		3100
	29700	7800		1500	6500			41000	283600		189000	82000		64300	240400	22900		10000		232700	43200	59100		4200
	66400	5800		1200	11300			367500	108000		62400	44200		281500	93600	12500		39000		37300	14000	31600		9300
	2300	4200		4400	17300			213200	170000		14300	107200		80400	114500	11800		166000		86000	55500	95300		14600
	12100	6300		10900	7300			128000	131000		149500	72500		81600	68800	46600		114500		156000	62200	25800		35000
	17700			10900				237000			316600			51400				300900		105600				15700
	14100			6400				294500			21500			22100				8800		131600				12700
	10500							252800						108800						76200
	16200							153400						54900						230700
